# Supplementary material for: Historical Redlining Is Associated with Present-Day Air Pollution Disparities in U.S. Cities
Source: PubMed Central journal article supplement — Environ Sci Technol Lett. 2022 Mar 9;9(4):345–50. doi: 10.1021/acs.estlett.1c01012 (PMC9009174; doi:10.1021/acs.estlett.1c01012), 2022-03-09
Supplement: ez1c01012_si_001.pdf [file ez1c01012_si_001.pdf]

1 Supporting Information

2 **Historical redlining is associated with present-day air pollution**  
3 **disparities in U.S. cities**

4 Haley M. Lane<sup>a,\*</sup>, Rachel Morello-Frosch<sup>b,c</sup>, Julian D. Marshall<sup>d</sup> and Joshua S. Apte<sup>a,b</sup>

5 <sup>a</sup> Department of Civil and Environmental Engineering, University of California, Berkeley, CA  
6 94720 USA

7 <sup>b</sup> School of Public Health, University of California, Berkeley, CA 94720 USA

8 <sup>c</sup> Department of Environmental Science, Policy, and Management, University of California,  
9 Berkeley, CA 94720 USA

10 <sup>d</sup> Department of Civil and Environmental Engineering, University of Washington, Seattle, WA  
11 USA

12 \* Corresponding author. Email: [apte@berkeley.edu](mailto:apte@berkeley.edu)

13

14

15

16 **Contents:**

17 Pages S1-S18

18 Table S1

19 Figures S1-S11

## 20 **S1 Materials and Methods**

### 21 S1.1 Data Preparation

22 We used GIS software to merge U.S. Census Bureau TIGER/Line state census block  
23 shape files and HOLC map shape files created by the Mapping Inequality project.<sup>1,2</sup> Mapped  
24 census blocks outside of the HOLC map areas were extended to encompass the city's associated  
25 census urban area (CUA) using TIGER/Line CUA boundaries. A map of all HOLC map cities  
26 and their accompanying CUAs is included in Figure S1. Block groups which had partial overlap  
27 with a HOLC area were labeled as 100% the overlapping grade because HOLC map negative  
28 space often reflects non-residential areas. In cases where HOLC neighborhoods with different  
29 grades overlapped with a single block, the clipped areas of the overlapping HOLC sections were  
30 used to determine population portioning for each grade. For example, a block with 3,000 m<sup>2</sup>  
31 designated as 'B' and 7,000 m<sup>2</sup> designated as 'C' would be identified as 30% 'B' and 70% 'C'  
32 regardless of whether the total block was 10,000 m<sup>2</sup> or 15,000 m<sup>2</sup> in area. This approach assumes  
33 that, for blocks with multiple HOLC categories, racial/ethnic groups would be evenly distributed  
34 between A-D categories based solely on area portioning. Note that 88% of the blocks which  
35 overlap with HOLC maps only overlap with 1 grade, and 96% of the overlapping blocks have a  
36 single grade attribution of at least 80%.

37 We characterized ambient outside annual PM<sub>2.5</sub> and NO<sub>2</sub> pollution levels on a block level  
38 using v1 empirical models developed by the Center for Air, Climate and Energy Solutions  
39 (CACES).<sup>3</sup> CACES provides annual ambient levels for 1979-2015, and year-2010 levels were  
40 used to be contemporaneous with the most recently available complete U.S. Census. Figure S7  
41 shows a sensitivity comparison using year-2015 estimates with the same year-2010 population

42 data. While overall estimated pollution levels decreased markedly over the 5-year period,  
43 intraurban HOLC disparities were largely unaffected by the overall trends.

44 The 2010 U.S. Census was used to characterize mapped area demographics. Total  
45 population was pulled from Table P1 while Hispanic and Latino population and non-Hispanic  
46 Asian, non-Hispanic Black, and non-Hispanic White populations were pulled from Table P5.<sup>4</sup>  
47 Population, demographics data, and air pollution levels were linked to the merged HOLC census  
48 block maps by fips code. A summary of the overall dataset populations is included in Table S1  
49 and illustrated in Figure S3, and examples of the different dataset inputs for Atlanta, GA are  
50 shown in Figure S2.

51 The HOLC road and rail analyses were developed using the TIGER/Line datasets for rail  
52 lines and primary roads across the US.<sup>1</sup> Buffer polygons were created for both datasets with  
53 buffer distances 150 m and 300 m. The 150 m buffer was chosen in order to reflect the point at  
54 which there is typically an ~50% reduction from peak road concentrations,<sup>5</sup> while the 300 m  
55 buffer was selected to reflect the likely extent of near-road impact based on the analysis of Su et  
56 al (2015).<sup>6</sup> Each buffer was then used to clip the HOLC-census block shapefile to determine  
57 which blocks, and what percentage of each block, was within each buffer distance of primary  
58 roads or railroads.

59 The industrial facility proximity analysis used similar methods with the 2017 National  
60 Emissions Inventory (NEI) facility-level emissions dataset.<sup>7</sup> Circular buffers with radii of 500 m  
61 and 1000 m were created for each source facility location within 1000 m of HOLC mapped  
62 areas. Larger buffers were chosen to account for the fact that a single coordinate for a facility  
63 may not fully reflect the locations of individual emissions sources within the facility. The  
64 number of source buffers overlapping with a given census block-HOLC grade polygon was

65 counted, and the annual NO<sub>x</sub> and primary PM<sub>2.5</sub> emissions for the overlapping sources were  
66 summed.

## 67 S1.2 Intraurban Analysis Methods

68 The size of HOLC mapped areas can vary widely between different regions and cities.  
69 Large, older cities such as New York, San Francisco, and Chicago, which were well developed  
70 in the 1930s, include mapped areas similar to the city's current footprint. However, there are  
71 notable variations in how the surrounding areas of these cities are represented given the  
72 significant increase in suburban sprawl since the 1930s. Conversely, some cities, particularly in  
73 the west, have grown significantly since HOLC maps were developed. For example, Phoenix,  
74 AZ has a population of more than 1 million people, but only approximately 75,000 people lived  
75 in the HOLC mapped areas as of 2010. The HOLC map does not represent modern-day Phoenix  
76 well because the city population has grown by a factor of 30 since 1930. There are also  
77 variations that reflect choices made by the mapping team which obfuscate intra-city  
78 comparisons. For example, the Los Angeles, CA shapefile includes several maps from different  
79 adjacent municipalities all labeled as Los Angeles while the Boston, MA suburbs are each  
80 included separately. However, we chose not to adjust these because not all cities within an  
81 individual CUA were contiguous, as was the case for Chicago, where closer suburbs were  
82 included as "Chicago" while further cities were separate. Additionally, the largest metropolitan  
83 region, New York, NY, includes each NYC borough as a separate city while incorporating the  
84 surrounding New Jersey regions, including the city of Newark, as county maps.

85 Overall city characteristics were characterized on a HOLC map basis to focus on  
86 differences within redlining areas. HOLC mapped areas exposures were higher than those in the  
87 broader urbanized areas given the HOLC focus on older, more developed sections of cities (see

88 Figure S4). Overall distributions were evaluated on a per-person basis, and statistics such as  
 89 means and standard deviations were weighted by block population. Equation 1 illustrates how  
 90 overall population-weighted means were calculated,

$$\overline{C}_{g,r} = \frac{\sum_{i=1}^N C_i * p_{i,g,r}}{\sum_{i=1}^N p_{i,g,r}} \quad \text{Eq. 1}$$

*N* = # of census blocks  
*n* = # of census blocks within a city  
*C* = pollution level  
*p* = population  
*i* = block  
*g* = grade  
 [A, B, C, D, All]  
*r* = race/ethnicity  
 [Asian, Black, Hispanic, White, Other, Total]

91  
 92 A city's average exposure level was characterized using the population-weighted mean pollution  
 93 level for the total population within HOLC mapped areas (See Eq. 2). Intraurban disparities were  
 94 determined by subtracting the city average exposure from individual block pollution estimates  
 95 (See Eq. 3), and in-grade disparities were similarly ascertained by subtracting a city's average  
 96 exposure within areas of the same HOLC grade (See Eq. 4).

$$\overline{C}_{city,g} = \frac{\sum_{i=1}^n C_i * p_{i,g,total}}{\sum_{i=1}^n p_{i,g,total}} \quad \text{Eq. 2}$$

$$\overline{dC}_{IU,g,r}(Intraurban) = \frac{\sum_{i=1}^n (C_i - \overline{C}_{city,all}) * p_{i,g,r}}{\sum_{i=1}^n p_{i,g,r}} \quad \text{Eq. 3}$$

$$\overline{dC}_{IG,g,r}(Intrgrade) = \frac{\sum_{i=1}^n (C_i - \overline{C}_{city,g}) * p_{i,g,r}}{\sum_{i=1}^n p_{i,g,r}} \quad \text{Eq. 4}$$

97  
 98 All pollution analyses, with the exception of the work included in Figure S11, are presented on a  
 99 population-weighted basis.

100 S1.3 Segregation Analysis Methods

101 We conducted a stylized sensitivity analysis to explore how overall racial-ethnic disparity  
102 arises from factors both related to and independent of segregation by historic HOLC group. We  
103 created two alternative exposure scenarios to evaluate the sensitivity of racial-ethnic disparities  
104 in HOLC mapped areas. These scenarios were as follows: (1) all between grade segregation is  
105 controlled for while preserving overall population density (Eq. 5) and (2) all within grade  
106 segregation is controlled for (Eq.6). Populations were adjusted as shown below.

$$p_{i,r}(1) = p_{i,total} * \frac{p_{City,r}}{p_{City,total}} * \frac{p_{g,r}}{p_{g,total}} \quad \text{Eq. 5}$$

$$p_{i,r}(2) = p_{i,total} * \frac{p_{g,r}}{p_{g,total}} \quad \text{Eq.6}$$

107  
108 An overall exposure analysis was conducted, consistent with the methods outlined in S1.2 using  
109 these adjusted block population numbers ( $p_{i,r}(1)$  and  $p_{i,r}(2)$ ), and results are summarized in  
110 Figure S10.

111 **References**

- 112 (1) U.S. Census Bureau. 2010 TIGER/Line Shapefiles (Machine Readable Datafiles). 2010.  
113 (2) Nelson, R. K.; Winling, L.; Marciano, R.; Connolly, N. Mapping Inequality. *Am. Panor.*  
114 (3) Kim, S.-Y.; Bechle, M.; Hankey, S.; Sheppard, L.; Szpiro, A. A.; Marshall, J. D.  
115 Concentrations of Criteria Pollutants in the Contiguous U.S., 1979 – 2015: Role of  
116 Prediction Model Parsimony in Integrated Empirical Geographic Regression. *PLoS ONE*  
117 **2020**, *15* (2). <https://doi.org/10.1371/journal.pone.0228535>.  
118 (4) U.S. Census Bureau. *2010 Census Summary File 2 - United States*; 2011.  
119 (5) Karner, A. A.; Eisinger, D. S.; Niemeier, D. A. Near-Roadway Air Quality: Synthesizing  
120 the Findings from Real-World Data. *Environ. Sci. Technol.* **2010**, *44* (14), 5334–5344.  
121 <https://doi.org/10.1021/es100008x>.  
122 (6) Su, J. G.; Apte, J. S.; Lipsitt, J.; Garcia-Gonzales, D. A.; Beckerman, B. S.; de Nazelle, A.;  
123 Texcalac-Sangrador, J. L.; Jerrett, M. Populations Potentially Exposed to Traffic-Related  
124 Air Pollution in Seven World Cities. *Environ. Int.* **2015**, *78*, 82–89.  
125 <https://doi.org/10.1016/j.envint.2014.12.007>.  
126 (7) US EPA, OAR. 2017 National Emissions Inventory (NEI) Data [https://www.epa.gov/air-](https://www.epa.gov/air-emissions-inventories/2017-national-emissions-inventory-nei-data)  
127 [emissions-inventories/2017-national-emissions-inventory-nei-data](https://www.epa.gov/air-emissions-inventories/2017-national-emissions-inventory-nei-data) (accessed 2022 -02 -02).  
128

129 **S2 Supporting Information Tables**

130 **Table S1.** Year-2010 U.S. Census population distribution by historic redlining status and overall  
 131 population (includes 202 cities in 146 CUAs)

| HOLC grade / spatial unit              | Asian | Black | Hispanic | White | Other | Total |
|----------------------------------------|-------|-------|----------|-------|-------|-------|
| A                                      | 4%    | 3%    | 2%       | 10%   | 5%    | 6%    |
| B                                      | 19%   | 18%   | 15%      | 27%   | 21%   | 22%   |
| C                                      | 52%   | 45%   | 50%      | 43%   | 49%   | 46%   |
| D                                      | 25%   | 34%   | 33%      | 19%   | 24%   | 26%   |
| HOLC-Mapped Areas (10 <sup>6</sup> )   | 3.15  | 10.4  | 10.7     | 19.3  | 1.29  | 44.8  |
| Census Urban Areas (10 <sup>6</sup> )  | 10.8  | 24.8  | 31.0     | 90.0  | 4.33  | 161   |
| US Urban Population (10 <sup>6</sup> ) |       |       |          |       |       | 249   |

132



S3 Supporting Information Figures

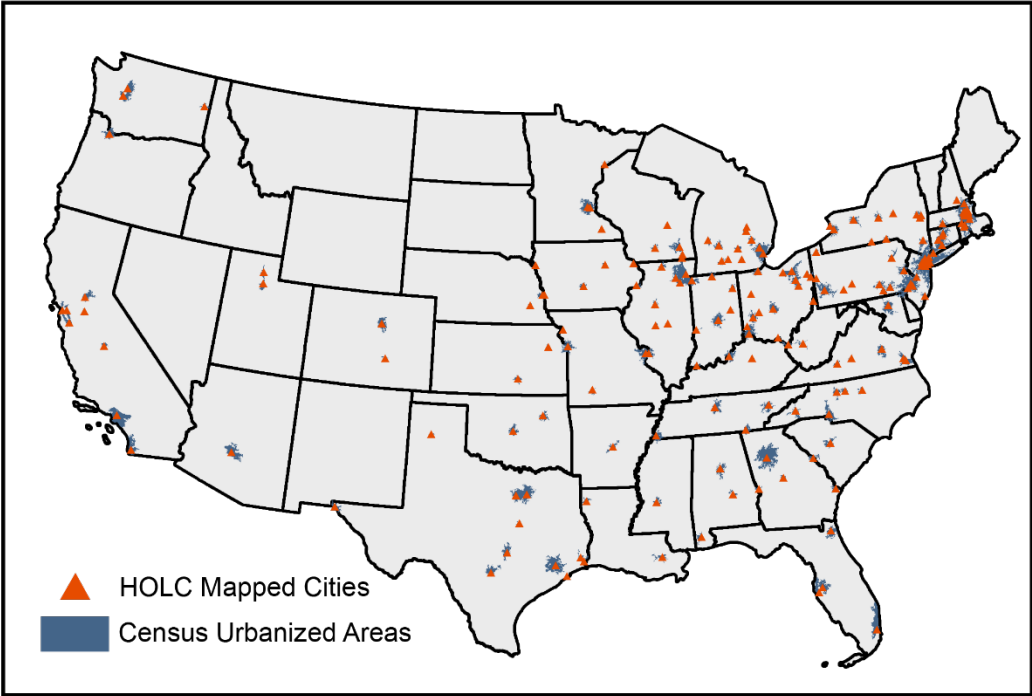

**Figure S1.** Locations of cities for which HOLC maps were drawn in the 20th century and the current census urbanized areas associated with each city. All cities shown here were included in this analysis.

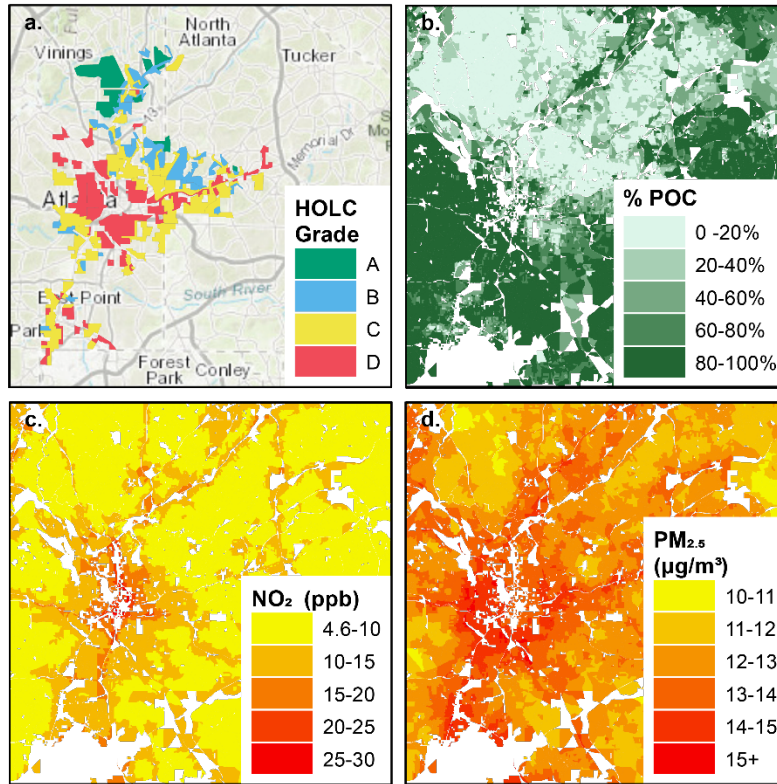

**Figure S2.** Illustration of input data sources in Atlanta, GA. (a) 1930's HOLC map for the City of Atlanta which classifies neighborhoods on an A-D scale based on the perceived favorability for home lending. (b) Prevalence of people of color in Atlanta, GA in year-2010 on a census block level. (c) Annual CACES modelled NO<sub>2</sub> levels for year-2010 on a census block level. (d) Annual CACES modelled PM<sub>2.5</sub> concentrations for year-2010 on a census block level.

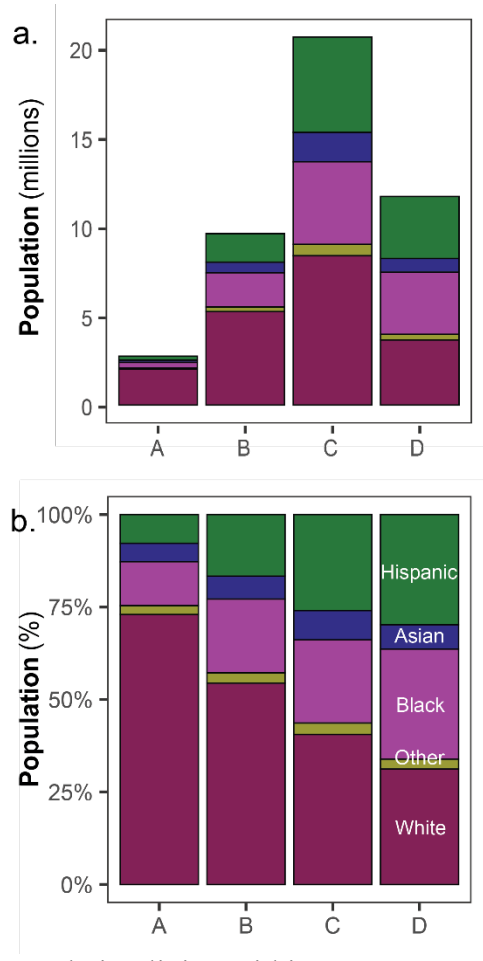

**Figure S3.** Demographics of population living within HOLC mapped areas in 2010 by (a) millions of people and (b) portion of the population within each grade. The A group population is small relative to other grades while the C grade contains the most people. Portion of population that is White decreases from A to D while the portion of people of color increases.

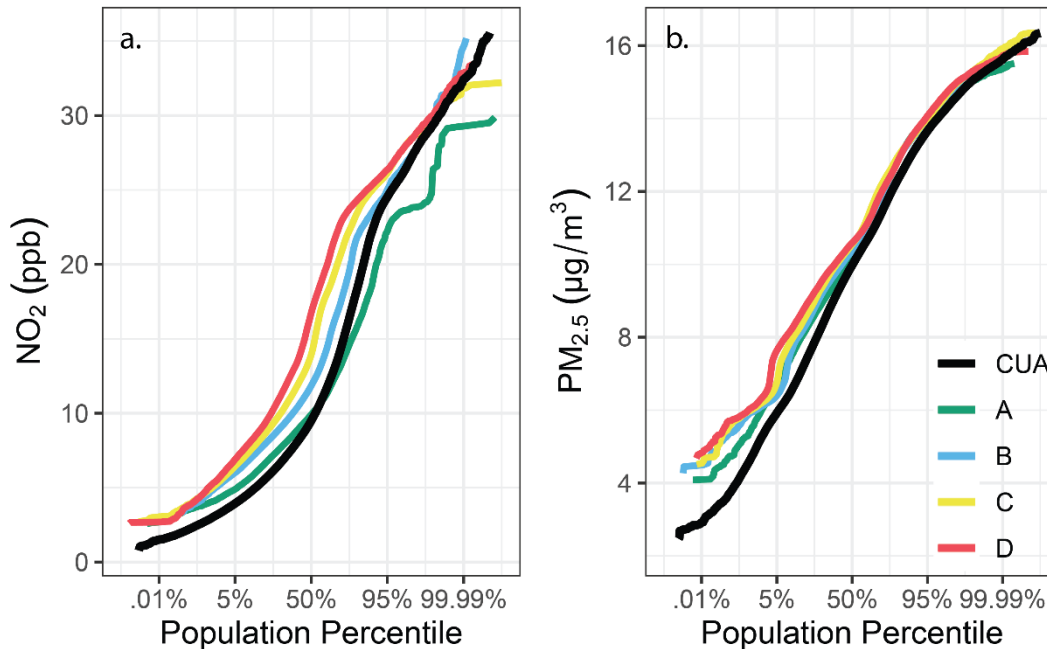

**Figure S4.** Overall cumulative exposure distribution for all HOLC mapped areas separated by HOLC grade. (a) NO<sub>2</sub> cumulative distribution. (b) PM<sub>2.5</sub> cumulative distribution. Both pollutants demonstrate a relatively monotonic relationship between worsening HOLC grade and an increased pollution level. However, NO<sub>2</sub> levels exhibit both a wider overall range and more between-grade difference than is observed for PM<sub>2.5</sub>. Overall CUA pollution levels, particularly at lower percentiles, tend to be less than within the HOLC mapped areas, particularly for groups B-D, which reflects how HOLC mapped areas tend to already emphasize the more developed, more polluted areas of cities.

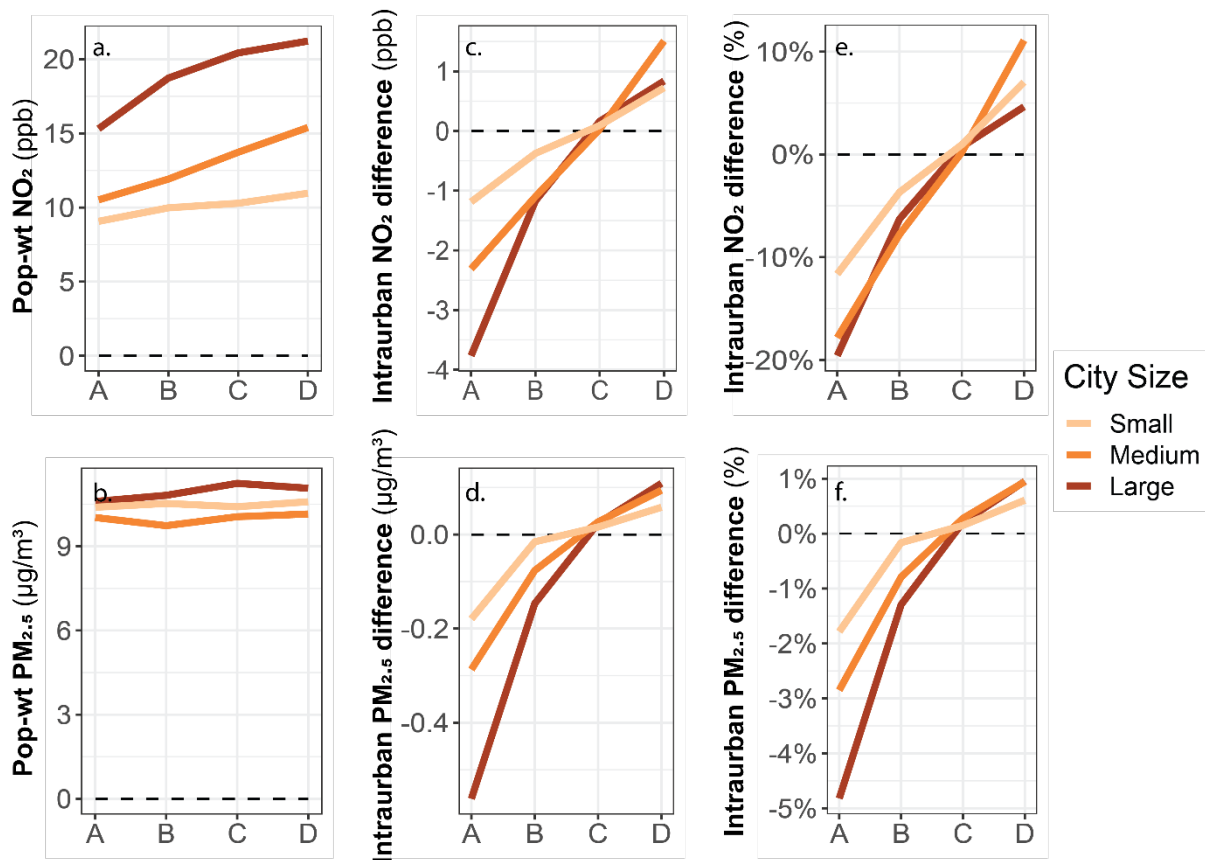

**Figure S5.** Comparison of population weighted mean pollution levels by city size. (a) Unadjusted NO<sub>2</sub> pop-weighted mean. (b) Unadjusted PM<sub>2.5</sub> pop-weighted mean. (c) Intraurban NO<sub>2</sub> pop-weighted mean. (d) Intraurban PM<sub>2.5</sub> pop-weighted mean. (e) Relative intraurban NO<sub>2</sub> pop-weighted mean. (f) Relative intraurban PM<sub>2.5</sub> pop-weighted mean. City size designations were determined to create groups of approximately equal overall populations within HOLC mapped areas (Small: n=162 pop=16 mill.; Medium: n=29 pop=11 mill.; Large: n=11 pop=18 mill.). This was chosen over using total city populations because, while unadjusted levels show some relationships with city size, the overall HOLC map size and population tended to correlate more with overall observed pollution level range. Larger cities tend to have substantially higher unadjusted PWM (a & b), but a monotonic A-D relationship is found across both pollutants and all 3 sizes of cities (c & d). NO<sub>2</sub> relative adjusted PWM also demonstrate less variation between city sizes than absolute adjusted PWM (e & f).

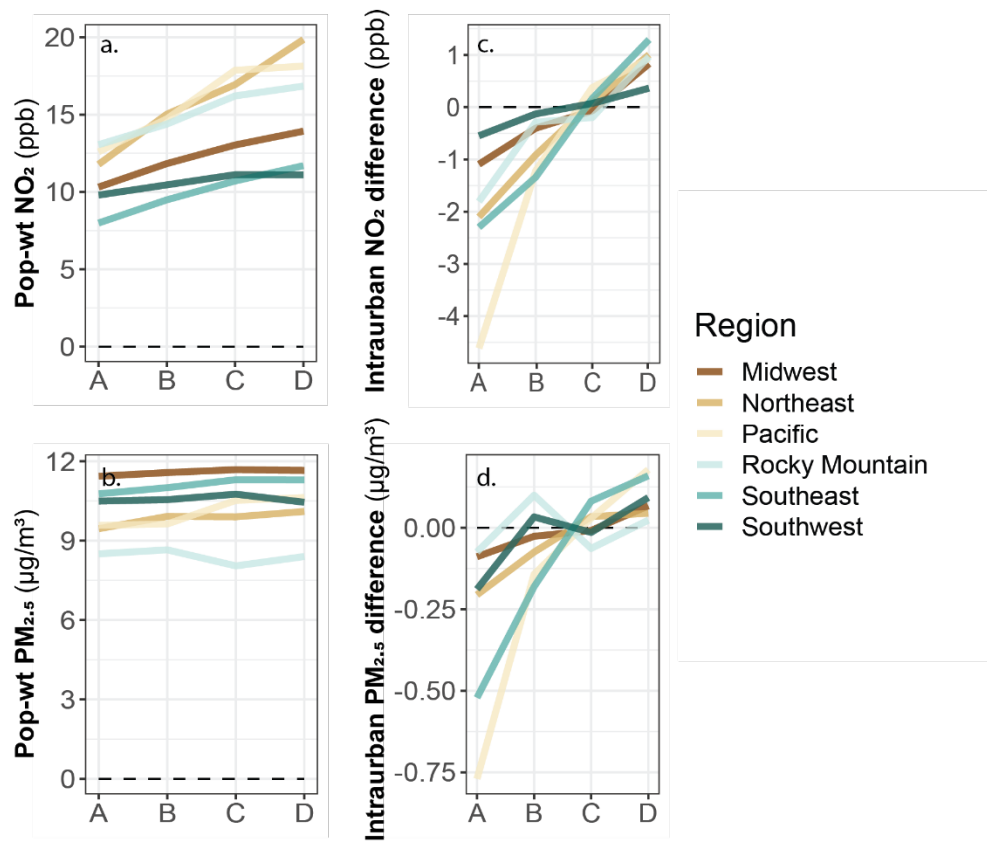

**Figure S6.** Regional comparison of population weighted mean pollution levels. (a) Unadjusted  $\text{NO}_2$  pop-weighted mean. (b) Unadjusted  $\text{PM}_{2.5}$  pop-weighted mean. (c) Intraurban  $\text{NO}_2$  pop-weighted mean. (d) Intraurban  $\text{PM}_{2.5}$  pop-weighted mean. Unadjusted results indicate regional trends for both pollutants. However,  $\text{PM}_{2.5}$  results suggest that regional trends are a significant determiner of overall concentrations, whereas within city differences (A-D) are still substantial for  $\text{NO}_2$ , consistent with a wide body of literature. Adjusted intraurban results illustrate that regional trends are removed when pollution levels are adjusted relative to city means.  $\text{NO}_2$  demonstrates a more consistent monotonic trend than  $\text{PM}_{2.5}$ , although trends are present for both, and the magnitude of HOLC trends varies by region. Note that these results can be heavily skewed by individual cities in the Pacific, Rocky Mountain, and Southwest due to the small numbers of mapped cities in these regions. The substantial A group differences observed for the Pacific region for both pollutants are driven by the particularly large A group disparities within only two cities: Oakland, CA and Los Angeles, CA.

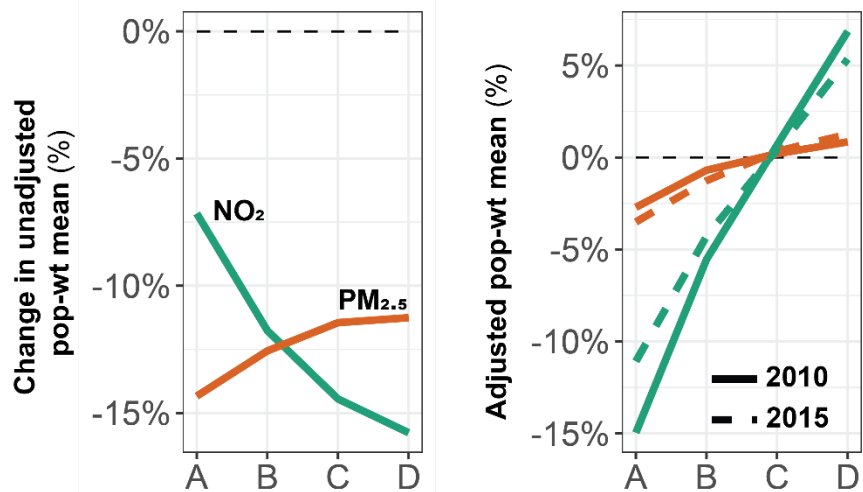

**Figure S7.** Model PWM pollution level interannual comparison. (a) Change in overall unadjusted pop-weighted mean between 2010 and 2015. (b) Comparison of overall interurban pop-weighted mean between 2010 and 2015. Overall populations decreased substantially between 2010 and 2015. However, changes in interurban HOLC, related disparities were minimal. This suggest that, at the summary level, populations within all grades experienced similar reductions in annual levels but that within-city HOLC related disparities were not substantially changed.

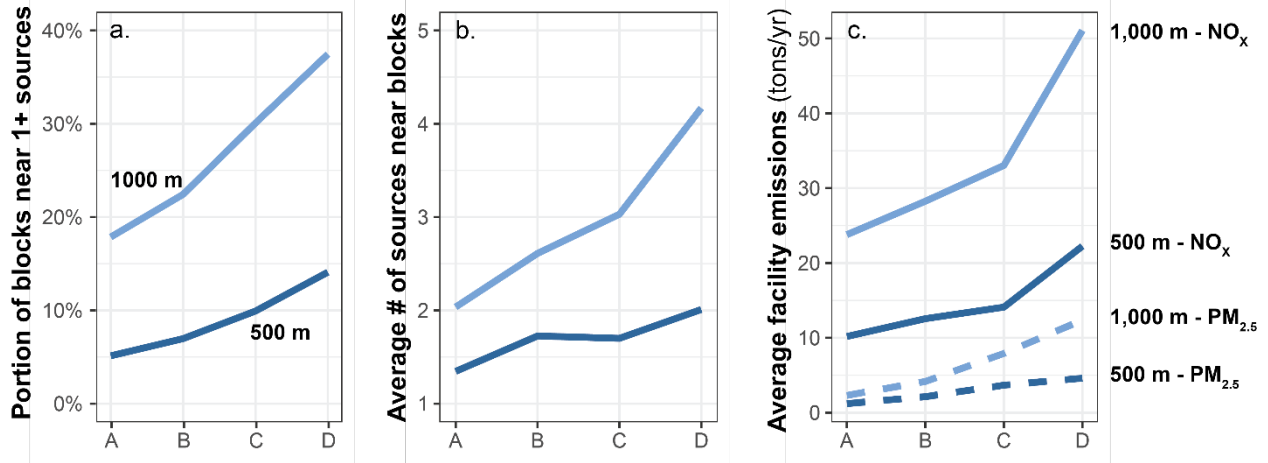

**Figure S8.** Distribution of industrial emissions sources by HOLC grade. National Emissions Inventory (NEI) facility prevalence in HOLC mapped areas by (a) % census blocks of a given grade within buffer distance of at least 1 source, by (b) average number of sources within buffer distance of a census block of a given grade for blocks near at least 1 source, and by (c) average annual emissions (tons/year) of sources within buffer distance of a census block of a given grade for blocks near at least 1 source. A strong, positive association was found between NEI facility prevalence and less-favorable HOLC grades.



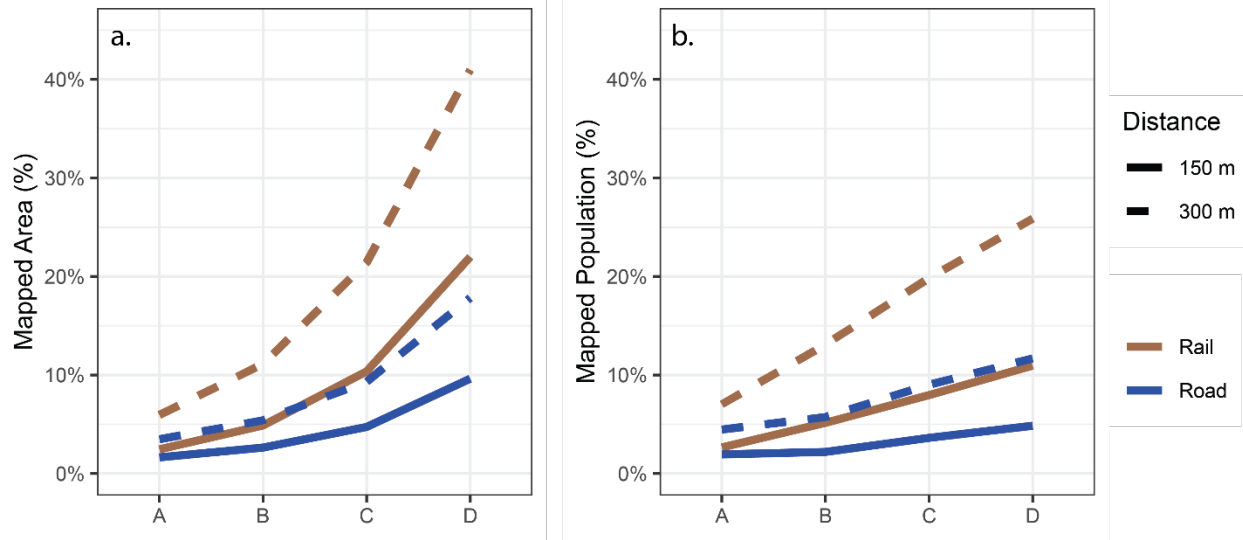

**Figure S9.** Transportation infrastructure by HOLC grade. Primary road and rail line prevalence in HOLC mapped areas by (a) % area within buffer distance of roads and rail and by (b) population living near roads and rail. A strong, positive association was found between rail line and road prevalence and worsening HOLC grades.

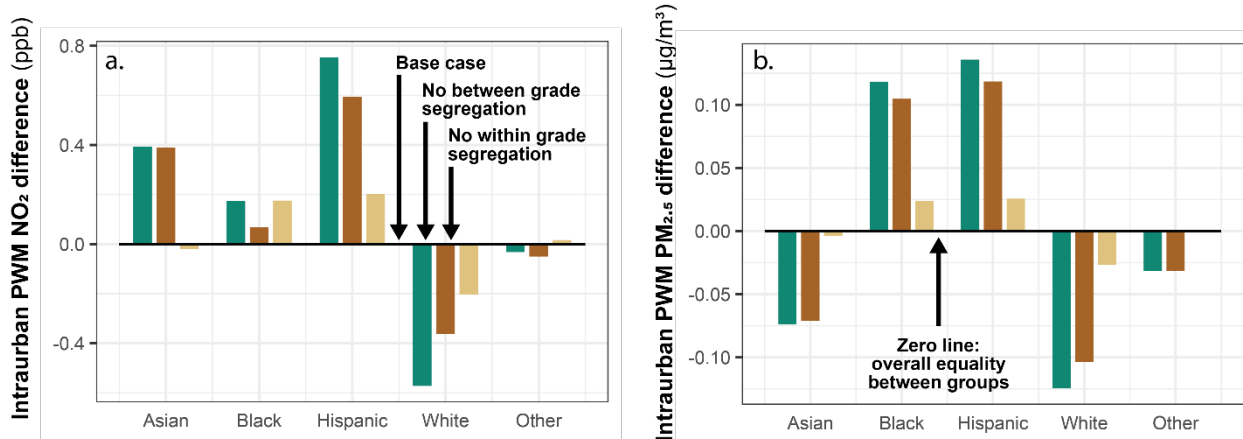

**Figure S10.** Segregation scenarios simulation. (a) Intraurban pop-weighted mean NO<sub>2</sub> levels by race/ethnicity. (b) Intraurban pop-weighted mean PM<sub>2.5</sub> concentrations by race/ethnicity. For PM<sub>2.5</sub>, the aggregate intraurban disparities faced by each race-ethnicity are only weakly reduced (4-17%) by eliminating between-grade segregation, but would be nearly eliminated (79-95% reduction) by removing within-grade segregation. For NO<sub>2</sub>, the results are more complex. Removing between-grade segregation would only minimally reduce the disparity for Asian and Hispanic populations (respectively 1 and 21%), and would moderately reduce the benefit that accrues to white populations (37%); in each case, within-grade disparity has a correspondingly larger effect. However, in contrast, removing between-HOLC-grade segregation would substantially reduce the intraurban NO<sub>2</sub> disparities that are faced by the Black population. This exception to the overall pattern is notable, especially in the context of the history of segregation and redlining: historic HOLC maps often made explicit and derogatory mention of Black communities as cause for an adverse classification.

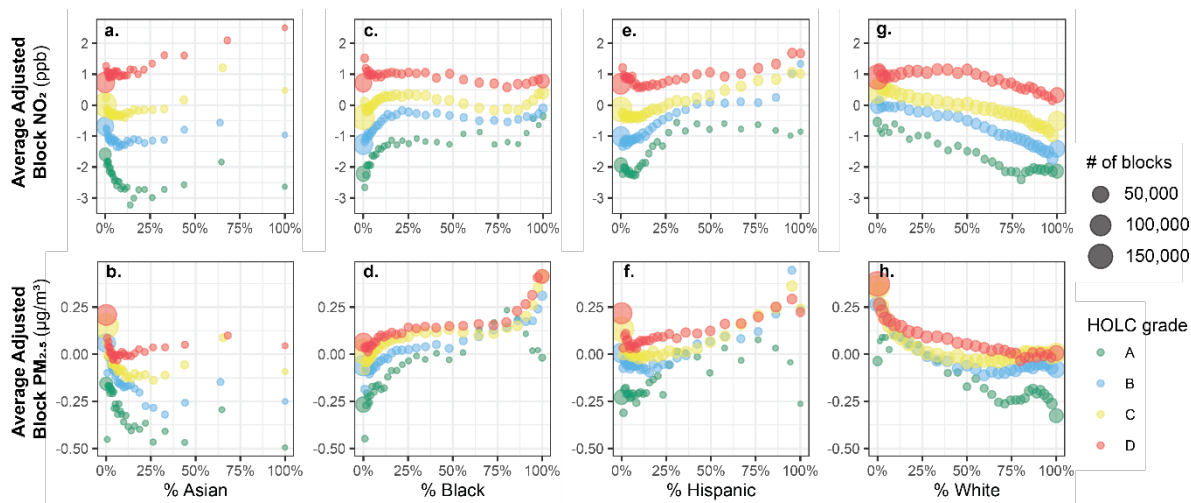

**Figure S11.** Average intraurban NO<sub>2</sub> levels by race/ethnicity prevalence and HOLC grade for (a) Asian, (c) Black, (e) Hispanic, and (g) White populations. Average intraurban PM<sub>2.5</sub> concentrations by race/ethnicity prevalence and HOLC grade for (b) Asian, (d) Black, (f) Hispanic, and (h) White populations. Census blocks which had a single HOLC grade areal apportionment of at least 80% were grouped into 31 equal number subsets based on increasing % race/ethnicity. Each subset was then divided by HOLC grade, and adjusted pollution level means are shown above, with point size indicating the number of census blocks included in each subset-grade group. These results illustrate that there are unique associations between intraurban pollution variation and race/ethnicity prevalence for each race/ethnicity group. Pollution tends to increase as Black and Hispanic prevalence increases, while levels decrease as the prevalence of White people increases. The relationships for Asian populations were less distinct, possibly in part due to the small number of census blocks with prevalence greater than 25%. Despite these overarching demographics related trends, distinct differences are observed by HOLC grade which, particularly for NO<sub>2</sub>, seem to be somewhat stepwise with each worsening HOLC grade. This suggests that the HOLC effect on air pollution disparities is at least partially distinct from race/ethnicity related disparities, as is explored in more depth in Figure S10.
